# Supplementary material for: Inverse design of semiconductor materials with deep generative models
Source: Royal Society of Chemistry journal article supplement (doi:10.1039/d4ta02872d), 2024-01-01
Supplement: d4ta02872d1.pdf [file d4ta02872d1.pdf]

# Supplementary Information

Inverse design of semiconductor materials with deep generative models

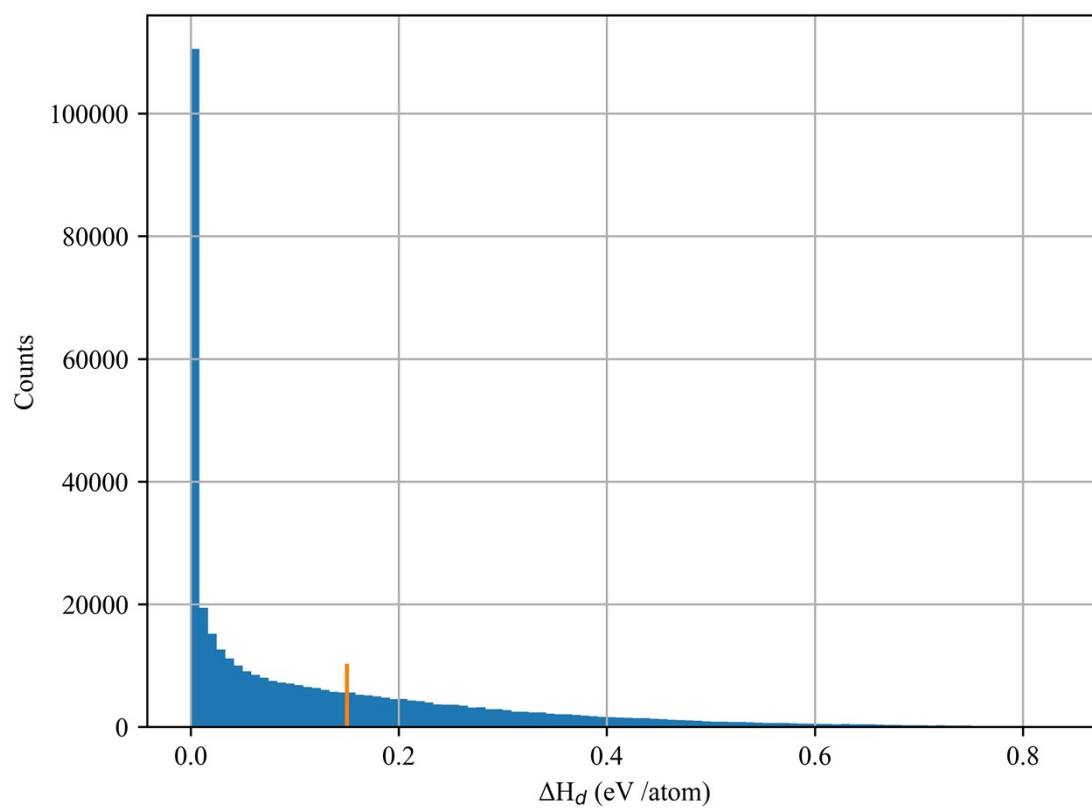

Fig. S1. Histogram of the distribution of decomposition enthalpy ( $\Delta H_d$ ) for the entire dataset. Approximately 2/3 of the samples in the dataset have a  $\Delta H_d$  less than or equal to 0.15 eV/atom.

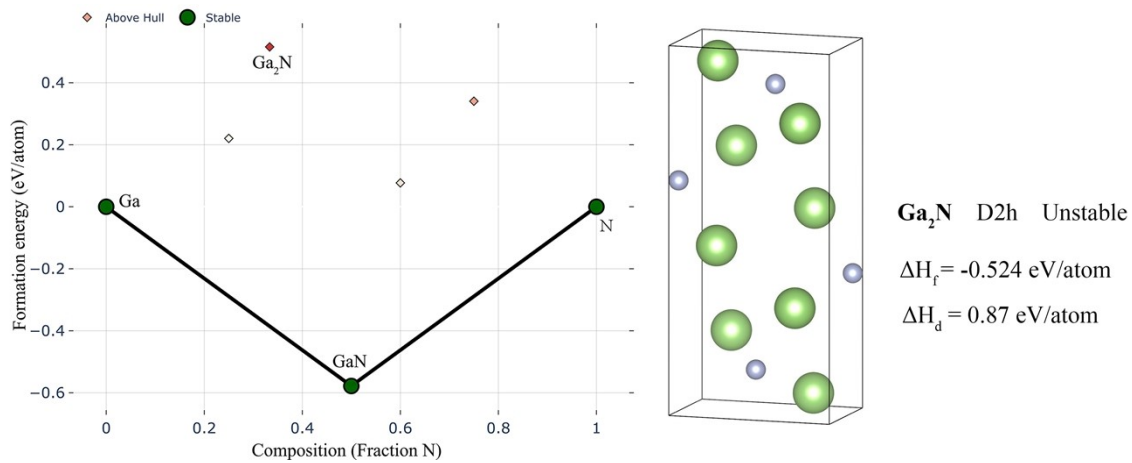

Fig. S2. The binary convex hull phase diagram for Ga-N systems incorporates the energies of Ga-N compositions from the dataset as well as the energy of Ga<sub>2</sub>N predicted by VGD-CG.

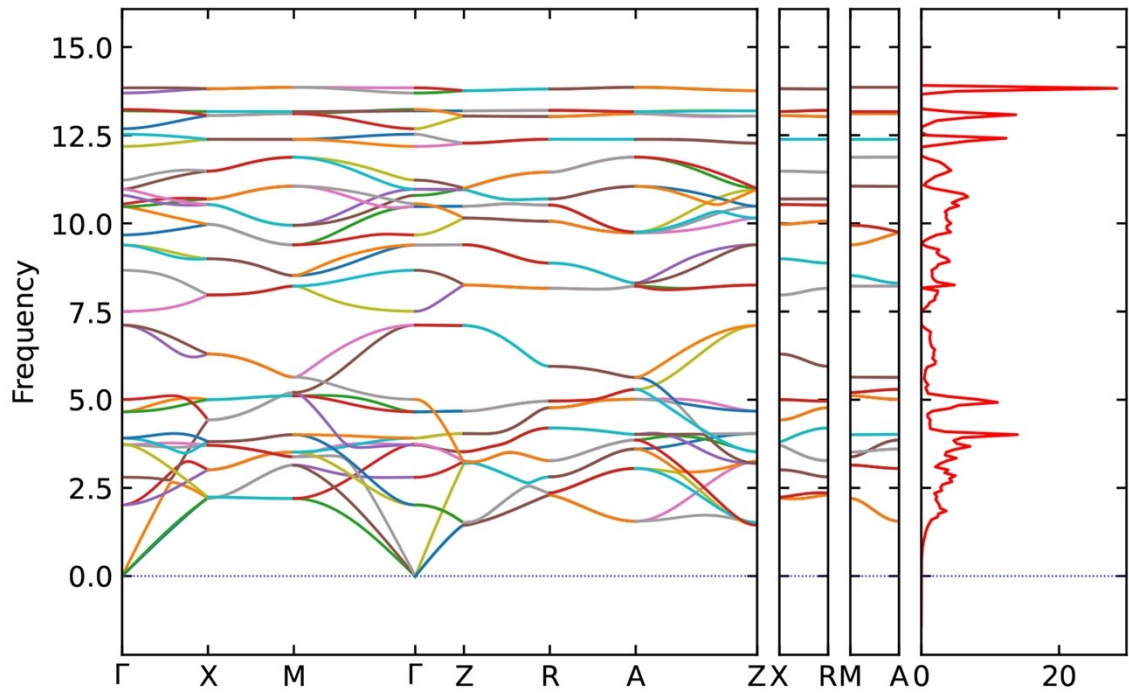

Fig. S3. The phonon dispersion curves calculated by PBE along symmetry lines in the Brillouin zone for  $\text{Si}_3\text{Ge}_2$ .

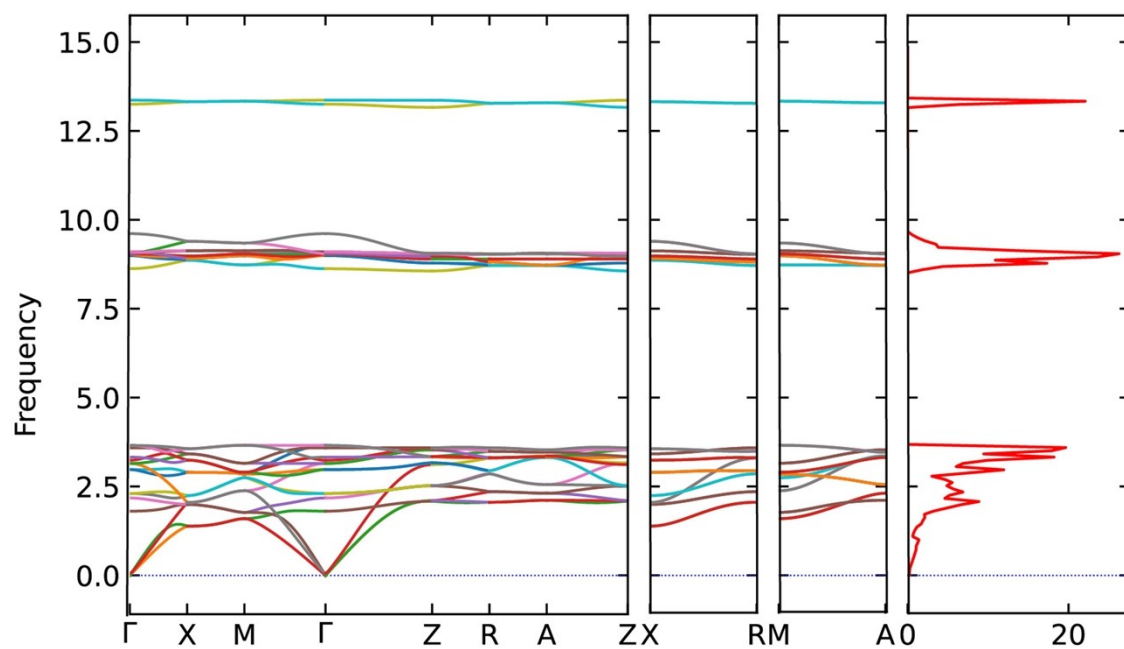

Fig. S4. The phonon dispersion curves calculated by PBE along symmetry lines in the Brillouin zone for  $\text{VBi}_3\text{O}_7$ .

Table S1. The setup of model hyperparameters used in VAE, GAN and DDPM.

| Parameters     | VAE   | GAN   | DDPM                 |
|----------------|-------|-------|----------------------|
| z_dim          | 128   | 128   | \                    |
| w_kl           | 0.01  | \     | \                    |
| batch_size     | 5120  | 5120  | 256                  |
| epochs         | 20    | 20    | 20                   |
| lr             | 0.001 | 0.001 | 0.0001               |
| optimizer      | Adam  | Adam  | Adam                 |
| train_ratio    | 0.9   | 0.9   | 0.9                  |
| test_ratio     | 0.1   | 0.1   | 0.1                  |
| n_critic       | \     | 5     | \                    |
| lambda_penalty | \     | 10    | \                    |
| beta_end       | \     | \     | 0.02                 |
| timesteps      | \     | \     | 500                  |
| beta_start     | \     | \     | 0.0001               |
| schedule_name  | \     | \     | linear_beta_schedule |
